# Supplementary figures and images for: Global analysis of cell behavior and protein dynamics reveals region-specific roles for Shroom3 and N-cadherin during neural tube closure
Source: eLife journal article supplement (doi:10.7554/elife.66704), 2022-03-03

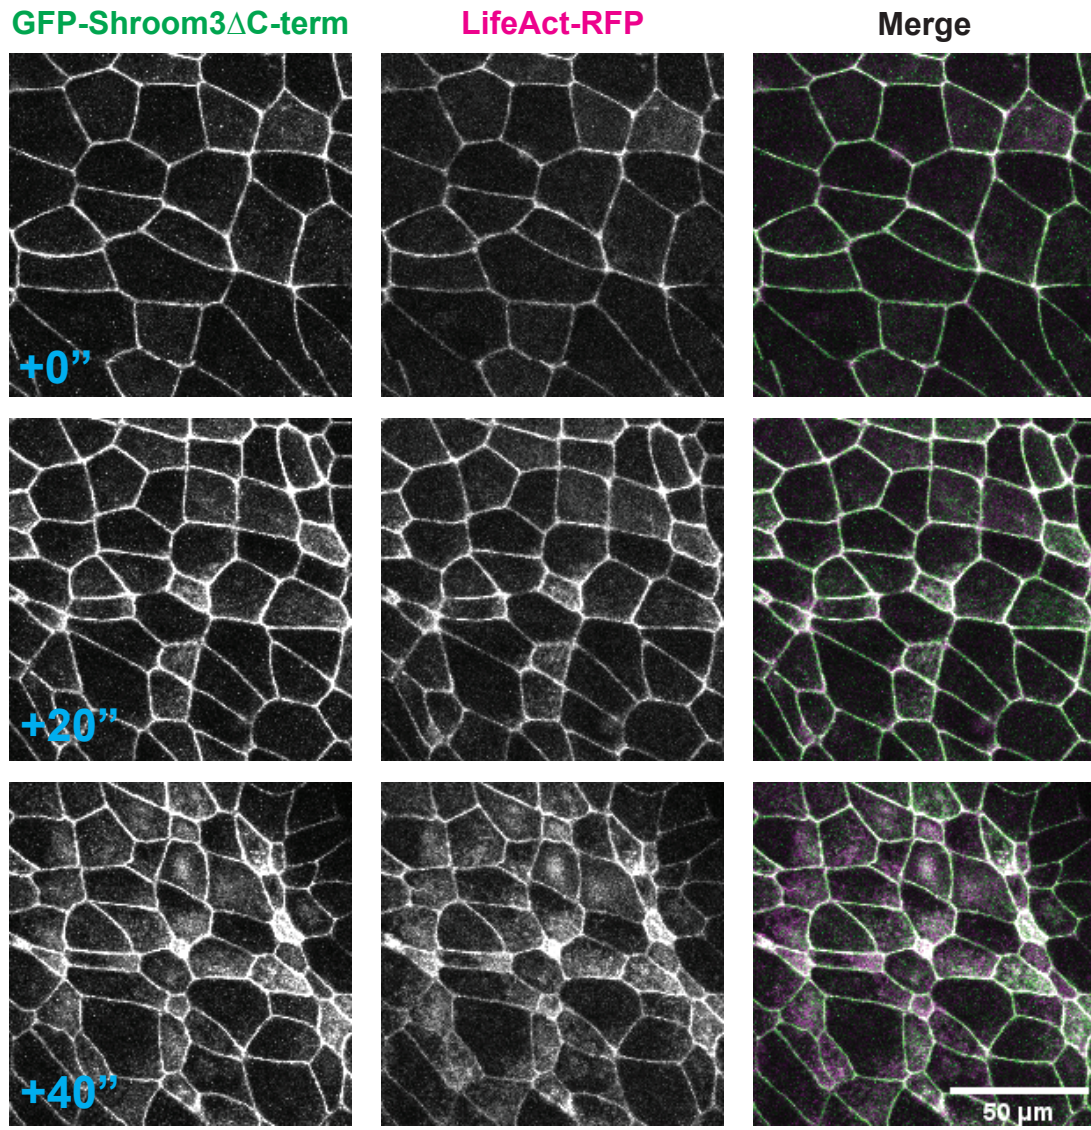

Supplement: supp [file elife-66704-supp-v1.zip]

**A**

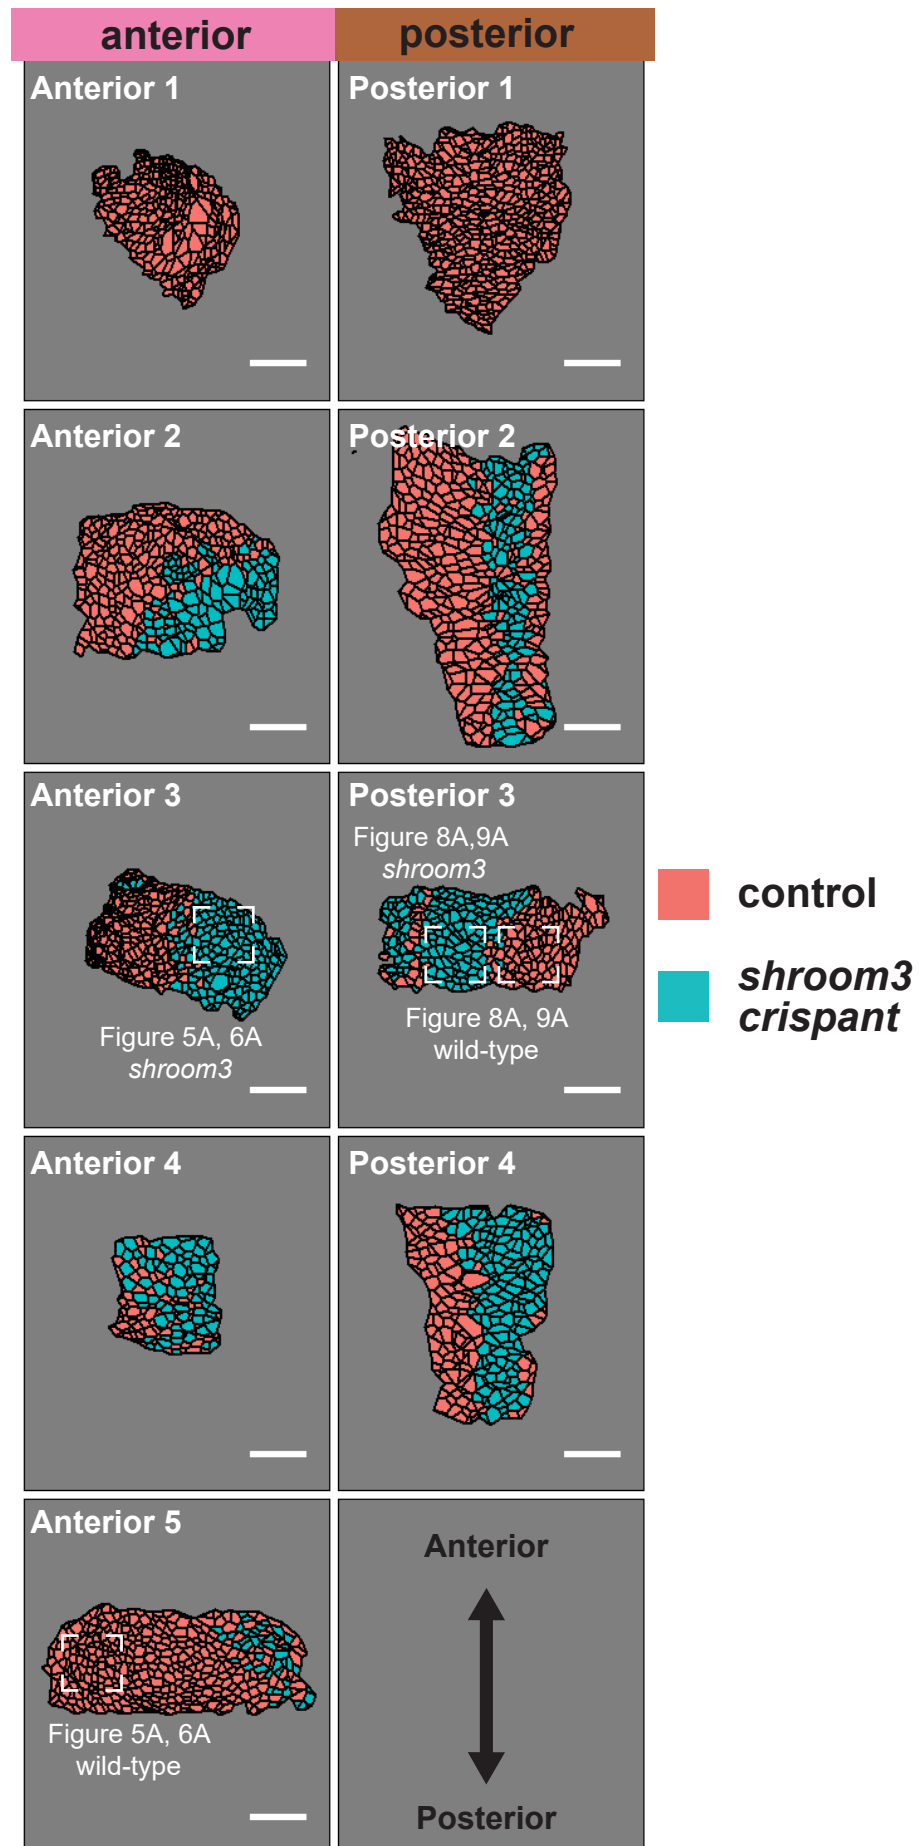

Supplement: supp [file elife-66704-supp-v1.zip]

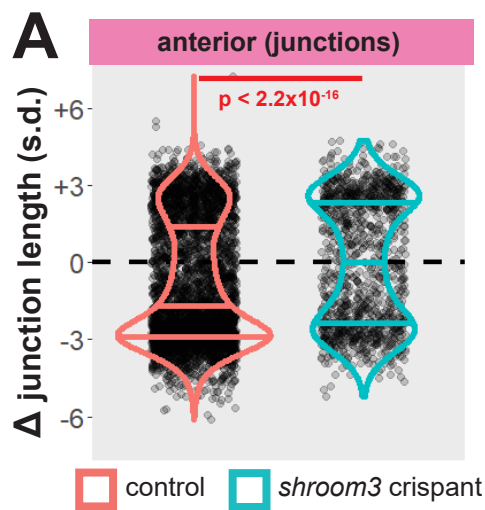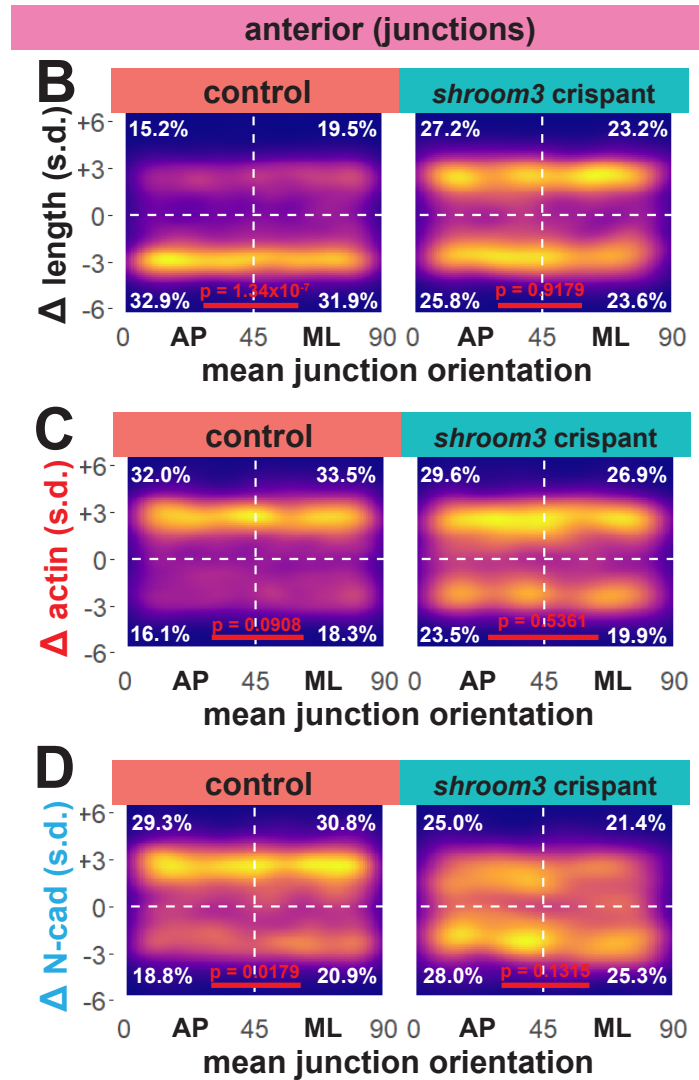

Supplement: supp [file elife-66704-supp-v1.zip]

**$\alpha$ -N-cadherin (NCD-2)**  
**~NF stage 13**

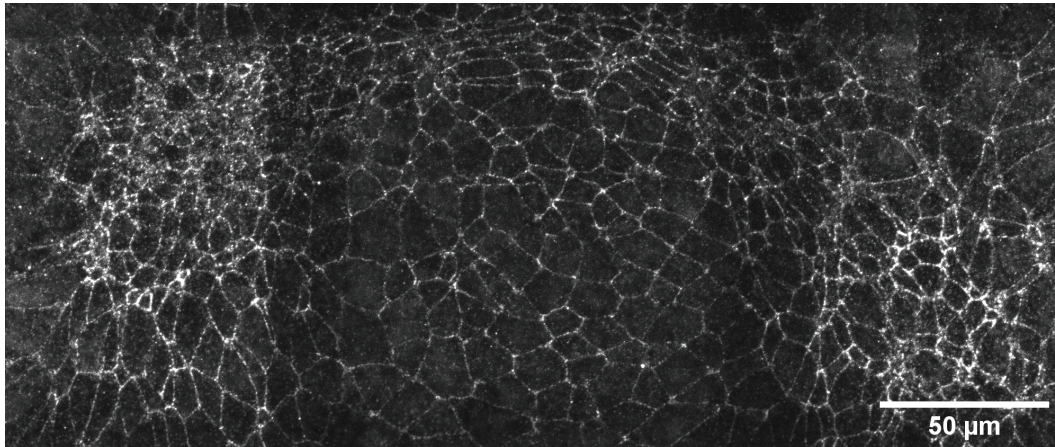

**~NF stage 14**

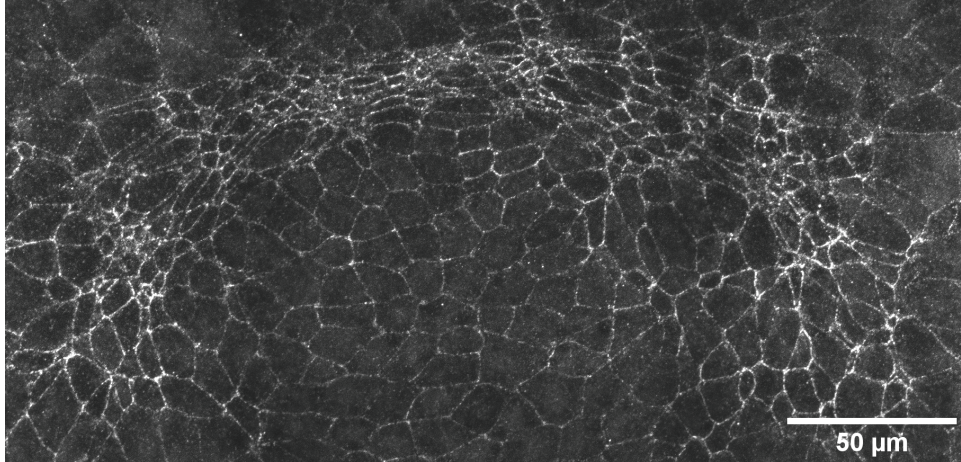

**~NF stage 16-17**

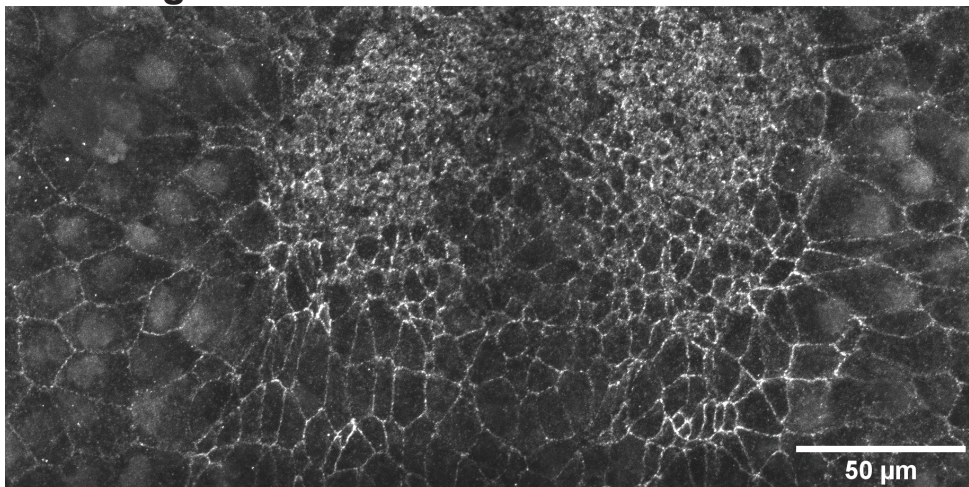

Supplement: supp [file elife-66704-supp-v1.zip]

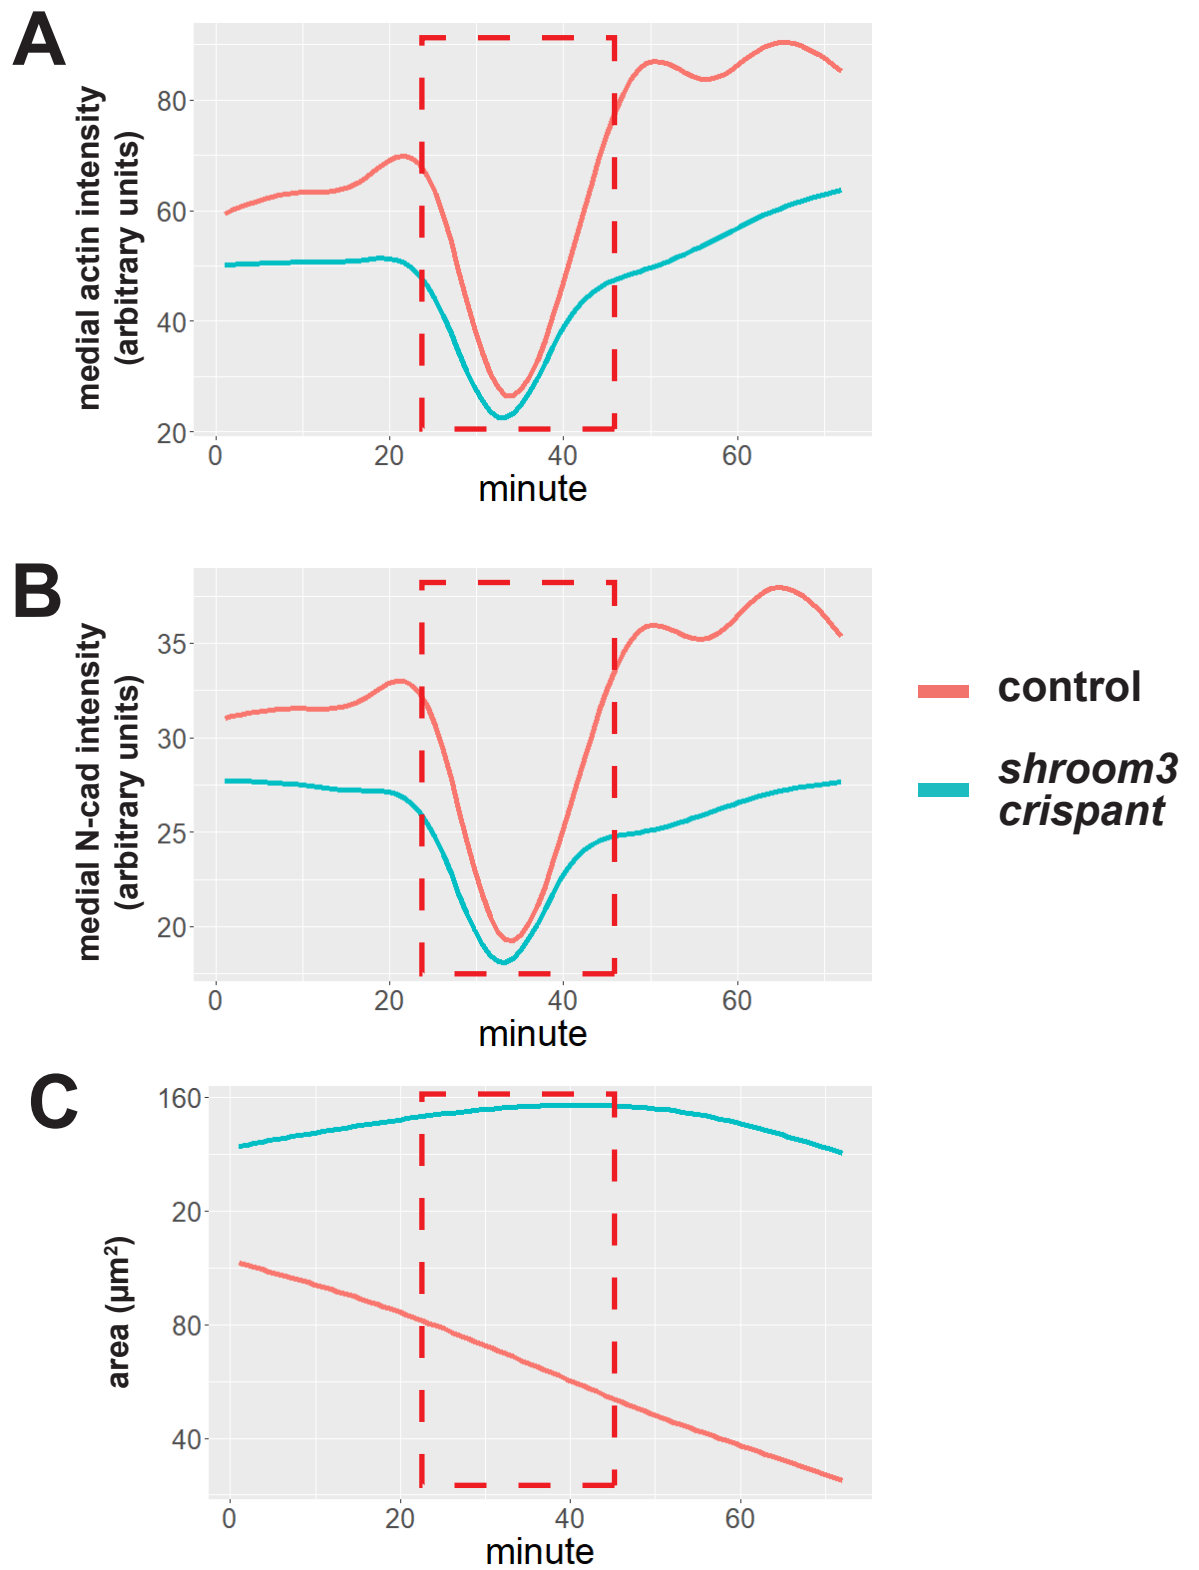

Supplement: supp [file elife-66704-supp-v1.zip]

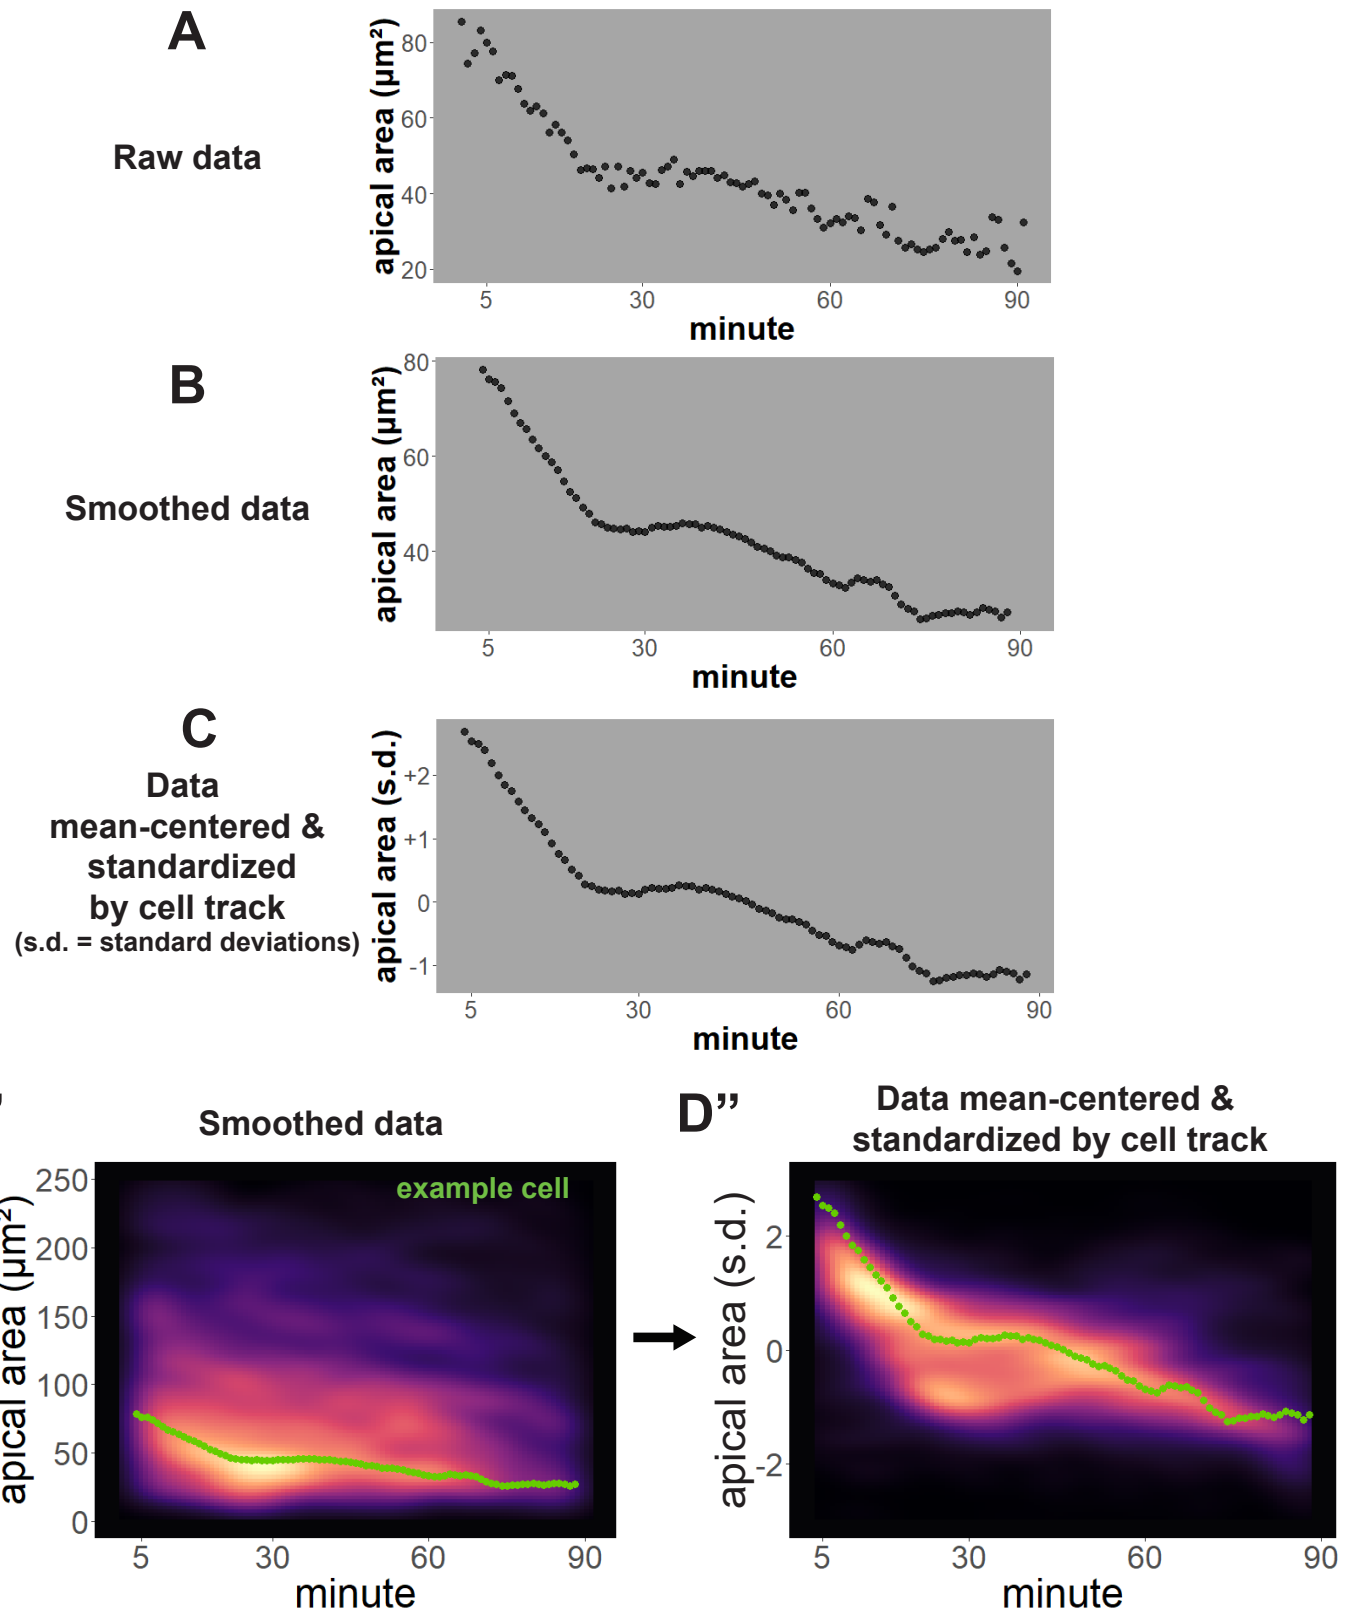

Supplement: supp [file elife-66704-supp-v1.zip]

**A***shroom3* (*Xenopus tropicalis*)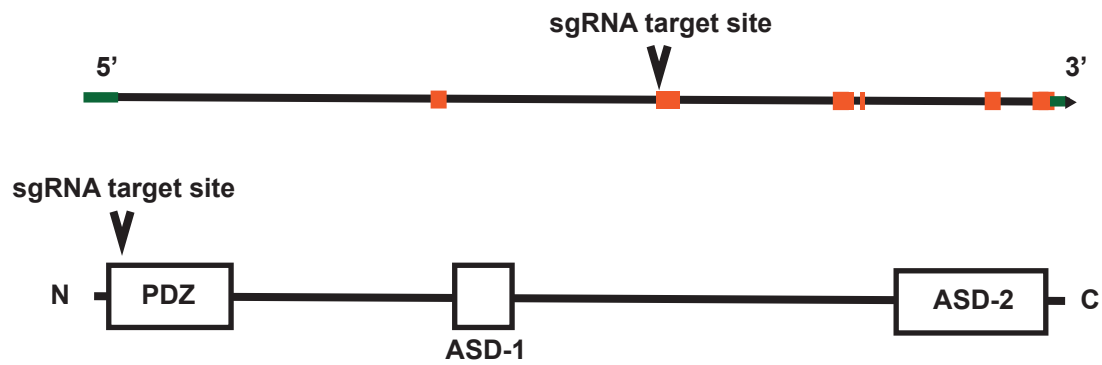**B**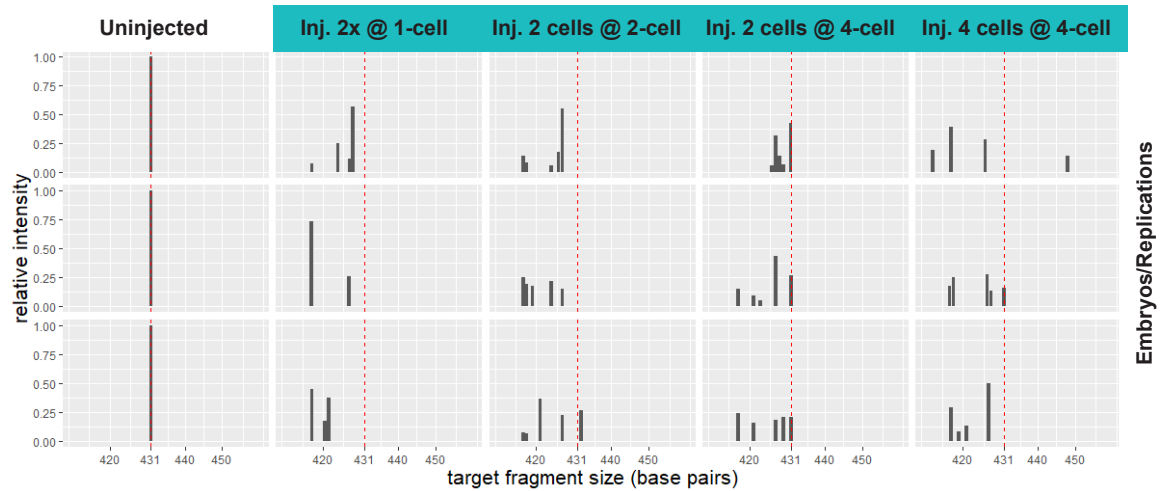**C**

brightfield

memRFP coinjection

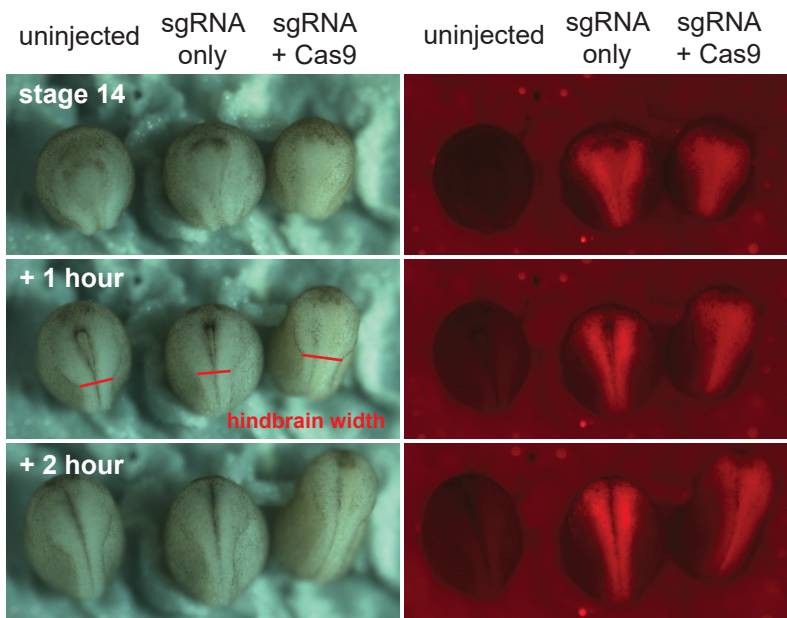**D**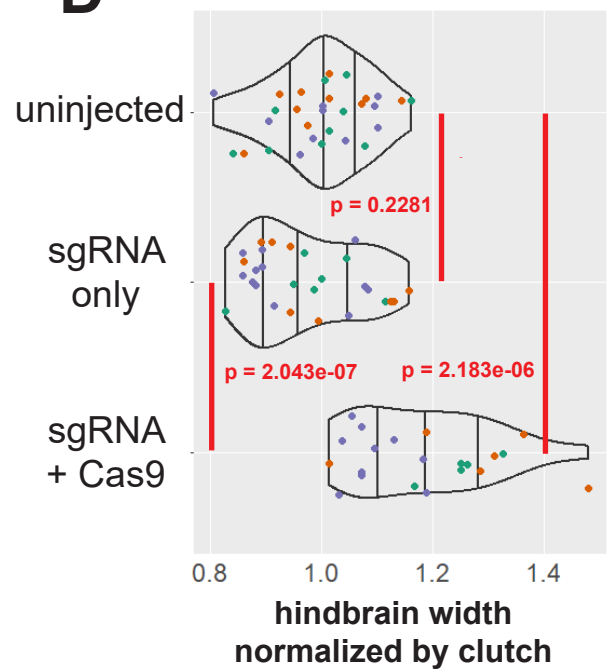

Supplement: supp [file elife-66704-supp-v1.zip]
